# Supplementary material for: Whole genome sequencing of experimental hybrids supports meiosis-like sexual recombination in Leishmania
Source: PubMed Central journal article supplement (PMC6519804; doi:10.1371/journal.pgen.1008042), 2019-05-15
Supplement: pgen.1008042.s008.pdf [file pgen.1008042.s008.pdf]

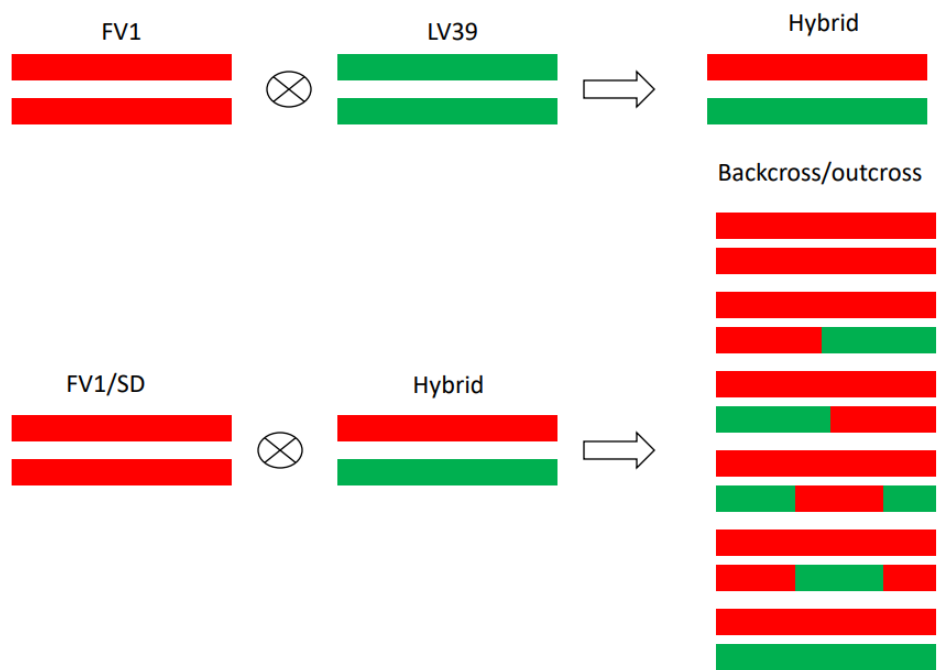

(A)

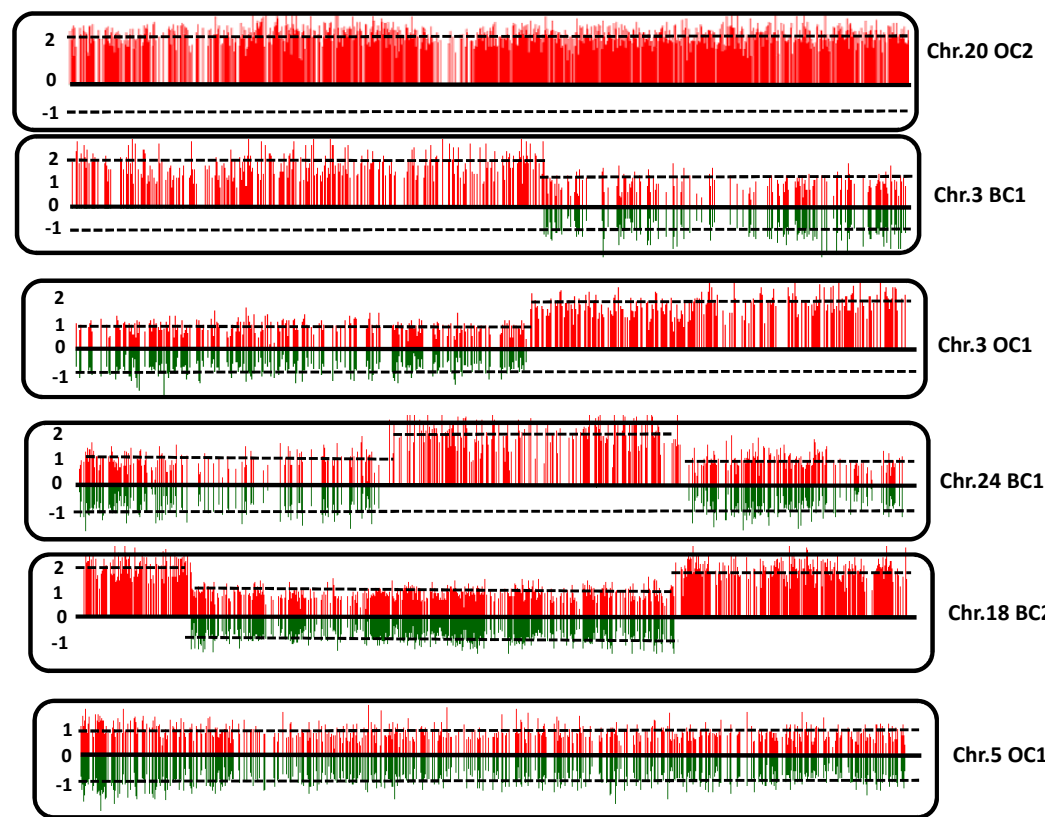

(B)
